# Supplementary material for: Effects of Complete and Partial Loss of the 24S-Hydroxycholesterol-Generating Enzyme Cyp46a1 on Behavior and Hippocampal Transcription in Mouse
Source: MDPI journal article supplement (doi:10.3390/biom14030254), 2024-02-21
Supplement: s1 [file s1]

## **Supplementary materials.**

### **Effects of complete and partial loss of the 24S-hydroxycholesterol-generating enzyme *Cyp46a1* on behavior and hippocampal transcription in mouse**

Hong-Jin Shu<sup>1\*</sup>, Luke H. Ziolkowski<sup>1,3\*</sup>, Sofia V. Salvatore<sup>1</sup>, Ann M. Benz<sup>1</sup>, David F. Wozniak<sup>1,2</sup>, Carla M. Yuede<sup>1</sup>, Steven M. Paul<sup>1,2</sup>, Charles F. Zorumski<sup>1,2</sup>, Steven Mennerick<sup>1,2</sup>

\*Contributed equally

<sup>1</sup>Department of Psychiatry

<sup>2</sup>Taylor Family Institute for Innovative Psychiatry Research

Washington University in St. Louis School of Medicine

<sup>3</sup> Current address: Department of Cellular and Molecular Physiology, Yale University School of Medicine

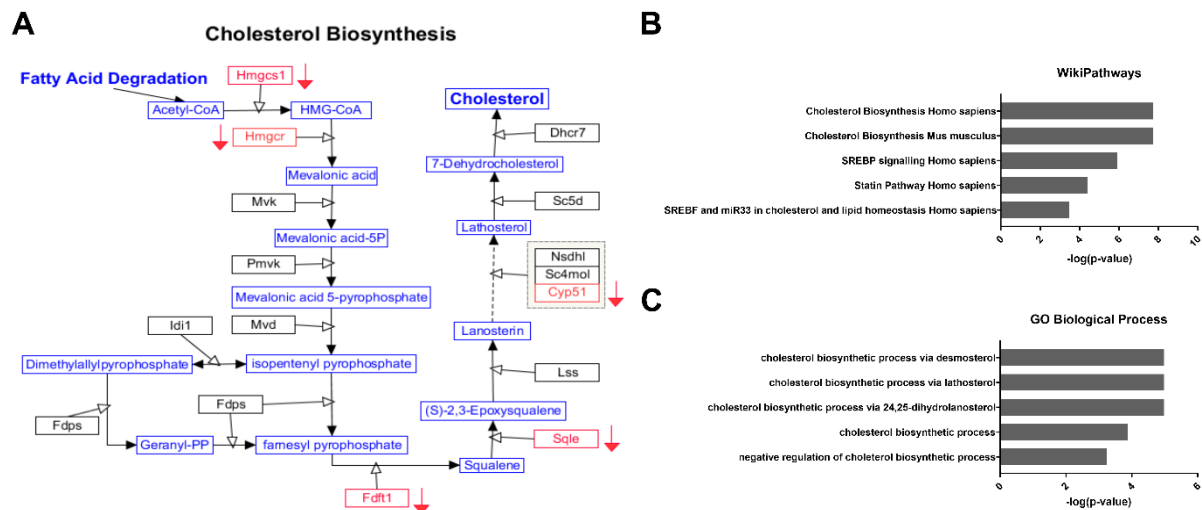

**Supplemental Figure S1.** Pathway analysis of transcriptional changes in hippocampal CA1 region. Red transcripts were downregulated in *Cyp46a1*<sup>-/-</sup> mice.

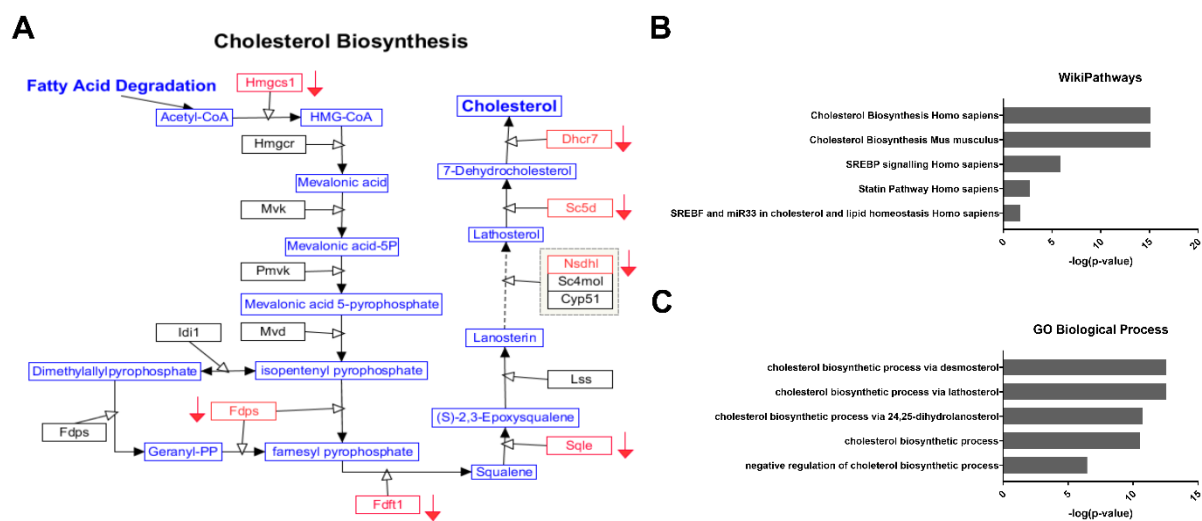

**Supplemental Figure S2.** Pathway analysis of transcriptional changes in hippocampal dentate gyrus region. Red transcripts were downregulated in *Cyp46a1*<sup>-/-</sup> mice.

|                           | PND100 |     | PND400 |
|---------------------------|--------|-----|--------|
|                           | KO     | cKO | KO     |
| 24S-HC                    | ----   | --- |        |
| Locomotion                | --     | NC  | NC     |
| Conditioned fear freezing | ++     | NC  | ++     |
| Morris maze acquisition   | -      |     |        |
| Morris maze retention     | NC     |     |        |
| LXR transcription targets | ++     | +   | ++     |

**Supplemental Table S1.** Summary of behavioral and transcriptional results from this study.

– and + designations indicate relative changes from WT mice. NC = no change. Morris water maze results were not evaluated in cKO or P400 animals because of lack of memory retention differences at P100 in KO animals.
